# Supplementary material for: Understanding External Influences on Target Detection and Classification Using Camera Trap Images and Machine Learning
Source: MDPI journal article supplement (doi:10.3390/s22145386), 2022-07-19
Supplement: s1 [file s1]

## Supplementary Material

### Analyst-Daylight-Detection Probability (DP) Pre-Outlier Model

Table S1 Summary of the best fit data before outlier removal for the analyst-daylight-DP model, with vegetation type, occlusion, distance, colour and orientation towards the CT.

| Variable        | Estimate         | 95% Confidence intervals           | P-value | Random effect (SD) |
|-----------------|------------------|------------------------------------|---------|--------------------|
| Fixed effects   |                  |                                    |         |                    |
| Intercept       | 181714.875024223 | (4.376, 7545059276.243)            | 0.026   |                    |
| Vegetation type |                  |                                    |         |                    |
| Riverine forest | 0.277            | (0.247, 0.311)                     | <0.001  |                    |
| Colour          |                  |                                    |         |                    |
| Green           | 0.781            | (0.712, 0.857)                     | <0.001  |                    |
| Distance        |                  |                                    |         |                    |
| 5 meters        | 1675.092         | (0.267, 10528679.554)              | 0.096   |                    |
| 10 meters       | 7.687            | (4.505, 13.118)                    | <0.001  |                    |
| 15 meters       | 0.445            | (0.369, 0.536)                     | <0.001  |                    |
| 20 meters       | 0.046            | (0.038, 0.056)                     | <0.001  |                    |
| 25 meters       | 0.026            | (0.021, 0.032)                     | <0.001  |                    |
| 30 meters       | 0.009            | (0.007, 0.011)                     | <0.001  |                    |
| Occlusion       |                  |                                    |         |                    |
| 34-67%          | 0.001            | ( $1.688 \times 10^{-8}$ , 17.325) | 0.155   |                    |
| 68-100%         | 0.000            | ( $4.522 \times 10^{-9}$ , 4.644)  | 0.095   |                    |

Orientation towards  
the CT

|                   |       |                |        |       |
|-------------------|-------|----------------|--------|-------|
| Yes               | 1.356 | (1.177, 1.562) | <0.001 |       |
| Random effect     |       |                |        |       |
| Experiment number |       |                |        | 0.799 |

Analyst-Daylight-DP Post-Outlier Model

Table S2 Summary of the best fit data after outlier removal for the analyst-daylight-DP model, with vegetation type, occlusion, distance, colour and orientation towards the CT.

| Variable        | Estimate            | 95% Confidence intervals                    | P-value | Random effect (SD) |
|-----------------|---------------------|---------------------------------------------|---------|--------------------|
| Fixed effects   |                     |                                             |         |                    |
| Intercept       | $2.047 \times 10^8$ | $(1.456 \times 10^5, 2.880 \times 10^{11})$ | <0.001  |                    |
| Vegetation type |                     |                                             |         |                    |
| Riverine forest | 0.277               | (0.247, 0.311)                              | <0.001  |                    |
| Colour          |                     |                                             |         |                    |
| Green           | 0.781               | (0.711, 0.856)                              | <0.001  |                    |
| Distance        |                     |                                             |         |                    |
| 10 meters       | 7.690               | (4.502, 13.137)                             | <0.001  |                    |
| 15 meters       | 0.445               | (0.369, 0.536)                              | <0.001  |                    |
| 20 meters       | 0.046               | (0.038, 0.056)                              | <0.001  |                    |
| 25 meters       | 0.026               | (0.021, 0.032)                              | <0.001  |                    |

|                            |                        |                                                 |        |
|----------------------------|------------------------|-------------------------------------------------|--------|
| 30 meters                  | 0.009                  | (0.007, 0.011)                                  | <0.001 |
| Occlusion                  |                        |                                                 |        |
| 34-67%                     | $4.800 \times 10^{-7}$ | $(3.394 \times 10^{-10}, 6.789 \times 10^{-4})$ | <0.001 |
| 68-100%                    | $1.287 \times 10^{-7}$ | $(9.082 \times 10^{-11}, 1.825 \times 10^{-4})$ | <0.001 |
| Orientation towards the CT |                        |                                                 |        |
| Yes                        | 1.356                  | (1.177, 1.562)                                  | <0.001 |
| Random effect              |                        |                                                 |        |
| Experiment number          |                        |                                                 | 0.799  |

#### ML-Daylight-DP Pre-Outlier Model

Table S3 Summary of the best fit data before outlier removal for model ML-daylight-DP, with vegetation type, occlusion and distance.

| Variable        | Estimate | 95% Confidence interval         | P-value | Random effect (SD) |
|-----------------|----------|---------------------------------|---------|--------------------|
| Fixed effect    |          |                                 |         |                    |
| Intercept       | 321.893  | (21.322, 4859.655)              | <0.001  |                    |
| Vegetation type |          |                                 |         |                    |
| Riverine forest | 0.278    | (0.231, 0.334)                  | <0.001  |                    |
| Distance        |          |                                 |         |                    |
| 5 meters        | 3611.616 | $(0.001, 2.514 \times 10^{10})$ | 0.308   |                    |
| 10 meters       | 8.170    | (4.089, 16.324)                 | <0.001  |                    |
| 15 meters       | 0.618    | (0.479, 0.797)                  | <0.001  |                    |

|                   |       |                |        |
|-------------------|-------|----------------|--------|
| 20 meters         | 0.069 | (0.053, 0.091) | <0.001 |
| 25 meters         | 0.049 | (0.037, 0.064) | <0.001 |
| 30 meters         | 0.016 | (0.012, 0.023) | <0.001 |
| Occlusion         |       |                |        |
| 34-67%            | 0.143 | (0.042, 0.484) | 0.002  |
| 68-100%           | 0.033 | (0.010, 0.111) | <0.001 |
| Random effect     |       |                |        |
| Experiment number |       |                | 0.806  |

#### ML-Daylight-DP Post-Outlier Model

Table S4 Summary of the best fit data after outlier removal for model ML-daylight-DP, with vegetation type, occlusion and distance.

| Variable        | Estimate | 95% Confidence interval | P-value | Random effect (SD) |
|-----------------|----------|-------------------------|---------|--------------------|
| Fixed effect    |          |                         |         |                    |
| Intercept       | 321.893  | (21.322, 4859.655)      | <0.001  |                    |
| Vegetation type |          |                         |         |                    |
| Riverine forest | 0.278    | (0.231, 0.334)          | <0.001  |                    |
| Distance        |          |                         |         |                    |
| 10 meters       | 8.176    | (4.089, 16.345)         | <0.001  |                    |
| 15 meters       | 0.618    | (0.479, 0.797)          | <0.001  |                    |
| 20 meters       | 0.069    | (0.053, 0.091)          | <0.001  |                    |

|                   |       |                |        |
|-------------------|-------|----------------|--------|
| 25 meters         | 0.049 | (0.037, 0.064) | <0.001 |
| 30 meters         | 0.016 | (0.012, 0.023) | <0.001 |
| Occlusion         |       |                |        |
| 34-67%            | 0.143 | (0.042, 0.484) | 0.002  |
| 68-100%           | 0.033 | (0.010, 0.111) | <0.001 |
| Random effect     |       |                |        |
| Experiment number |       |                | 0.806  |

#### ML-Dusk-DP Pre-Outlier Model

Table S5 Summary of the best fit data before outlier removal for the ML-dusk-DP model, with occlusion and distance.

| Variable      | Estimate               | 95% Confidence interval                   | P-value | Random effect (SD) |
|---------------|------------------------|-------------------------------------------|---------|--------------------|
| Fixed effects |                        |                                           |         |                    |
| Intercept     | 192.688                | (29.664, 1251.645)                        | <0.001  |                    |
| Distance      |                        |                                           |         |                    |
| 10 meters     | 1.508                  | (1.232, 1.844)                            | <0.001  |                    |
| 15 meters     | 2.926                  | (2.418, 3.540)                            | <0.001  |                    |
| 20 meters     | 0.235                  | (0.175, 0.314)                            | <0.001  |                    |
| 25 meters     | $2.115 \times 10^{-5}$ | ( $6.173 \times 10^{-18}$ , 72444111.734) | 0.465   |                    |
| 30 meters     | $2.115 \times 10^{-5}$ | ( $6.173 \times 10^{-18}$ , 72444111.734) | 0.465   |                    |
| Occlusion     |                        |                                           |         |                    |

|                   |       |                                    |        |
|-------------------|-------|------------------------------------|--------|
| 34-67%            | 0.038 | (0.012, 0.120)                     | <0.001 |
| 68-100%           | 0.000 | (6.306 × 10 <sup>-5</sup> , 0.001) | <0.001 |
| Random effect     |       |                                    |        |
| Experiment number |       |                                    | 0.714  |

ML-Dusk-DP Post-Outlier Model

| Table S6 Summary of the best fit data after outlier removal for the ML-dusk-DP model, with occlusion and distance. |          |                         |         |                    |
|--------------------------------------------------------------------------------------------------------------------|----------|-------------------------|---------|--------------------|
| Variable                                                                                                           | Estimate | 95% Confidence interval | P-value | Random effect (SD) |
| Fixed effects                                                                                                      |          |                         |         |                    |
| Intercept                                                                                                          | 6.423    | (3.275, 12.597)         | <0.001  |                    |
| Distance                                                                                                           |          |                         |         |                    |
| 10 meters                                                                                                          | 0.852    | (0.657, 1.104)          | <0.001  |                    |
| 15 meters                                                                                                          | 1.497    | (0.908, 4.760)          | <0.001  |                    |
| 20 meters                                                                                                          | 0.605    | (0.268, 0.942)          | <0.001  |                    |
| Occlusion                                                                                                          |          |                         |         |                    |
| 34-67%                                                                                                             | 1.449    | (1.027, 2.045)          | <0.001  |                    |
| 68-100%                                                                                                            | 0.003    | (0.002, 0.004)          | <0.001  |                    |
| Random effect                                                                                                      |          |                         |         |                    |
| Experiment number                                                                                                  |          |                         |         | 0.714              |

ML-Dusk-Correct Classification (CC) Pre-Outlier Model

Table S7 Summary of the best fit data before outlier removal for the ML-dusk-CC model, with occlusion and distance.

| Variable          | Estimate               | 95% Confidence interval                              | P-value | Random effect (SD) |
|-------------------|------------------------|------------------------------------------------------|---------|--------------------|
| Fixed effects     |                        |                                                      |         |                    |
| Intercept         | 1862.329               | (92.222, 37607.935)                                  | <0.001  |                    |
| Distance          |                        |                                                      |         |                    |
| 10 meters         | 23891.701              | ( $7.528 \times 10^{-85}$ , $7.583 \times 10^{92}$ ) | 0.923   |                    |
| 15 meters         | 0.096                  | (0.012, 0.783)                                       | 0.029   |                    |
| 20 meters         | 0.000                  | ( $2.391 \times 10^{-5}$ , 0.002)                    | <0.001  |                    |
| 25 meters         | $7.42 \times 10^{-3}$  | ( $4.271 \times 10^{-5}$ , 0.015)                    | <0.001  |                    |
| 30 meters         | $1.232 \times 10^{-4}$ | ( $5.221 \times 10^{-7}$ , 0.162)                    | <0.001  |                    |
| Occlusion         |                        |                                                      |         |                    |
| 34-67%            | 1.732                  | (0.101, 29.578)                                      | 0.704   |                    |
| 68-100%           | 0.992                  | (0.060, 16.443)                                      | 0.995   |                    |
| Random effect     |                        |                                                      |         |                    |
| Experiment number |                        |                                                      |         | 2.683              |

#### ML-Dusk-CC Post-Outlier Model

Table S8 Summary of the best fit data after outlier removal for the ML-dusk-CC model, with occlusion and distance.

| Variable      | Estimate | 95% Confidence interval | P-value | Random effect (SD) |
|---------------|----------|-------------------------|---------|--------------------|
| Fixed effects |          |                         |         |                    |

|           |         |                   |        |
|-----------|---------|-------------------|--------|
| Intercept | 422.749 | (94.991, 744.651) | <0.001 |
|-----------|---------|-------------------|--------|

Distance

|           |       |                |       |
|-----------|-------|----------------|-------|
| 15 meters | 0.097 | (0.013, 0.781) | 0.005 |
|-----------|-------|----------------|-------|

|           |       |                                  |        |
|-----------|-------|----------------------------------|--------|
| 20 meters | 0.002 | ( $2.38 \times 10^{-5}$ , 0.004) | <0.001 |
|-----------|-------|----------------------------------|--------|

|           |                       |                                   |        |
|-----------|-----------------------|-----------------------------------|--------|
| 25 meters | $7.42 \times 10^{-3}$ | ( $4.271 \times 10^{-5}$ , 0.015) | <0.001 |
|-----------|-----------------------|-----------------------------------|--------|

|           |                        |                                   |        |
|-----------|------------------------|-----------------------------------|--------|
| 30 meters | $1.232 \times 10^{-4}$ | ( $5.221 \times 10^{-7}$ , 0.162) | <0.001 |
|-----------|------------------------|-----------------------------------|--------|

Occlusion

|        |       |                |       |
|--------|-------|----------------|-------|
| 34-67% | 0.092 | (0.001, 2.510) | 0.002 |
|--------|-------|----------------|-------|

|         |       |                                   |        |
|---------|-------|-----------------------------------|--------|
| 68-100% | 0.001 | ( $1.227 \times 10^{-2}$ , 0.129) | <0.001 |
|---------|-------|-----------------------------------|--------|

---

Random effect

|                   |       |
|-------------------|-------|
| Experiment number | 2.683 |
|-------------------|-------|

---
